# Supplementary material for: The archaeome in metaorganism research, with a focus on marine models and their bacteria–archaea interactions
Source: Front Microbiol. 2024 Feb 27;15:1347422. doi: 10.3389/fmicb.2024.1347422 (PMC10927989; doi:10.3389/fmicb.2024.1347422)
Supplement: SUPPLEMENTARY TABLE S1 — Read counts and amplicon sequence variants during processing and quality control of the archaeal and bacterial datasets. [file Table_1.xlsx]

## Sheet: Amplicon processing Archaea
Read counts per host of the raw data	Archaea
	#ASVs	#samples	Total reads	Min read	Max reads	Median	Average
Original dataset total:	8775	214	5871779	3	103214	29550	27438.2
Homo sapiens	1342	27	1035687	3	103214	33419	38358.8
Mus musculus/domesticus	557	10	286188	13743	39007	30637.5	28618.8
Galleria mellonella	143	20	389034	11	55756	2411.5	19451.7
Drosophila melanogaster	297	10	110738	5753	19006	10335	11073.8
Zostera marina	1907	20	930115	18441	68919	44336	46505.8
Triticum aestivum	248	20	382283	1419	39912	20975.5	19114.2
Hydra	111	10	50941	308	23229	1969	5094.1
C. elegans	879	10	202201	168	36473	24230.5	20220.1
Aplysina aerophoba	285	20	594979	13612	48841	30011.5	29749
Aurelia aurita	455	18	456501	326	50714	30997	25361.2
Mnemiopsis leidyi	428	12	466065	1371	78724	36853	38838.8
Halichondria panicea	473	10	373853	29906	52965	36345.5	37385.3
Positive controls	305	13	443271	16151	64042	32235	34097.8
Negative/Prep controls	499	12	52235	3	20568	185.5	4352.92
Cyanobacteria ctrl	140	2	97688	43958	53730	48844	48844
ASVs with 0 reads (due to exclusion of some samples)	1484
After decontam & before sample cutoff (> 500 reads)	#ASVs	#samples	Total reads	Min read	Max reads	Median	Average
Total:	2783	138	2805728	2	78348	16632.5	20331.4
Homo sapiens	94	19	81983	3	52756	339	4314.89
Mus musculus/domesticus	1	1	2	2	2	2	2
Galleria mellonella	4	5	22	3	7	4	4.4
Drosophila melanogaster	5	9	18679	3	18639	8	3735.8
Zostera marina	1617	19	776967	423	66146	42286	40893
Triticum aestivum	140	12	197903	681	26695	18178.5	16491.9
Hydra	8	3	16625	73	16470	82	5541.67
C. elegans	17	7	24232	28	15814	673	3461.71
Aplysina aerophoba	87	11	314198	13586	33637	30076	28563.5
Aurelia aurita	81	14	312123	3	47116	21970.5	22294.5
Mnemiopsis leidyi	96	11	395313	18	78348	47682	35937.6
Halichondria panicea	441	10	269831	7477	39554	28690	26983.1
Positive controls	277	12	119961	5	37066	7464	9996.75
Negative/Prep controls	0	0	0	0	0	0	0
Cyanobacteria ctrl	0	0	0	0	0	0	0
After sample cutoff (> 500 reads)	#ASVs	#samples	Total reads	Min read	Max reads	Median	Average
Total:	2753	100	2802892	568	78348	28185	28028.9
Homo sapiens	71	8	80846	661	52756	2560.5	10105.8
Mus musculus/domesticus	0	0	0	0	0	0	0
Galleria mellonella	0	0	0	0	0	0	0
Drosophila melanogaster	5	1	18639	18639	18639	18639	18639
Zostera marina	1617	18	776544	5492	66146	43585.5	43141.3
Triticum aestivum	140	12	197903	681	26695	18178.5	16491.9
Hydra	5	1	16470	16470	16470	16470	16470
C. elegans	14	5	24173	568	15814	755	4834.6
Aplysina aerophoba	79	9	255073	13586	33637	30076	28341.4
Aurelia aurita	77	10	312088	8405	47116	36823.5	31208.8
Mnemiopsis leidyi	90	7	394682	888	78348	63079	56383.1
Halichondria panicea	441	10	269831	7477	39554	28690	26983.1
Positive controls	269	8	119629	5613	37066	14417.5	14953.6
Negative/Prep controls	0	0	0	0	0	0	0
Cyanobacteria ctrl	0	0	0	0	0	0	0
	Before cutoff 500 reads			After cutoff 500 reads
Percent remaining after QF	#ASVs	#samples	Total reads	#ASVs	#samples	Total reads
Total:	31.7151	64.486	47.7833	31.3732	46.729	47.735
Homo sapiens	7.00447	70.3704	7.91581	5.29061	29.6296	7.80603
Mus musculus/domesticus	0.179533	10	0.000698841	0	0	0
Galleria mellonella	2.7972	25	0.00565503	0	0	0
Drosophila melanogaster	1.6835	90	16.8677	1.6835	10	16.8316
Zostera marina	84.7929	95	83.5345	84.7929	90	83.489
Triticum aestivum	56.4516	60	51.7687	56.4516	60	51.7687
Hydra	7.20721	30	32.6358	4.5045	10	32.3315
C. elegans	1.93402	70	11.9841	1.59272	50	11.9549
Aplysina aerophoba	30.5263	55	52.8083	27.7193	45	42.8709
Aurelia aurita	17.8022	77.7778	68.3729	16.9231	55.5556	68.3652
Mnemiopsis leidyi	22.4299	91.6667	84.8193	21.028	58.3333	84.6839
Halichondria panicea	93.2347	100	72.1757	93.2347	100	72.1757
Positive controls	90.8197	92.3077	27.0627	88.1967	61.5385	26.9878
Negative/Prep controls	0	0	0	0	0	0
Cyanobacteria ctrl	0	0	0	0	0	0

## Sheet: Amplicon processing bacteria
Read counts per host of the raw data
	#ASVs	#samples	Total reads	Min read	Max reads	Median	Average
Original dataset total:	20113	202	6045133	370	103536	25113	29926.4
Homo sapiens	4200	30	970010	7826	82987	29580	32333.7
Mus musculus/domesticus	968	10	104760	2937	22890	9211	10476
Galleria mellonella	302	20	580796	3196	60406	27628.5	29039.8
Drosophila melanogaster	765	10	411301	15006	60332	44391.5	41130.1
Zostera marina	3052	20	710084	11508	103536	26326	35504.2
Triticum aestivum	747	19	200779	1188	18247	11379	10567.3
Hydra	235	10	428350	12745	98301	25362.5	42835
C. elegans	3119	10	399499	16074	67907	37558.5	39949.9
Aplysina aerophoba	438	9	138921	8923	28250	13032	15435.7
Aurelia aurita	852	18	818231	20262	79715	43332.5	45457.3
Mnemiopsis leidyi	1369	12	599757	21847	70736	52992.5	49979.8
Halichondria panicea	913	10	288154	15179	57163	24773.5	28815.4
Positive controls	4072	13	334723	9294	50469	20349	25747.9
Negative/Prep controls	532	11	59768	370	19513	2040	5433.45
ASVs with 0 reads (due to exclusion of some samples)	6593
After decontam & before sample cutoff (> 500 reads)	#ASVs	#samples	Total reads	Min read	Max reads	Median	Average
Total:	19368	194	5190629	7	97390	22865	26755.8
Homo sapiens	2258	21	714238	4693	79888	33264	34011.3
Mus musculus/domesticus	872	10	85260	2937	22890	6141	8526
Galleria mellonella	240	20	416794	1803	56842	16594.5	20839.7
Drosophila melanogaster	666	10	219424	4831	43386	21155	21942.4
Zostera marina	2932	20	479080	11102	48647	21739	23954
Triticum aestivum	547	8	19253	701	5306	1929.5	2406.62
Hydra	197	10	331854	6978	83836	15338	33185.4
C. elegans	3037	10	382222	15972	65633	35389	38222.2
Aplysina aerophoba	432	9	138879	8923	28247	13032	15431
Aurelia aurita	805	18	813296	20255	79019	43281	45183.1
Mnemiopsis leidyi	1301	12	566860	21815	68165	50222	47238.3
Halichondria panicea	869	10	283275	14473	56874	24001	28327.5
Positive controls	3997	13	312342	8638	46398	20349	24026.3
Negative/Prep controls	241	5	17955	504	9092	2043	3591
After sample cutoff (> 500 reads)	#ASVs	#samples	Total reads	Min read	Max reads	Median	Average
Total:	19335	185	5189244	578	97390	23133	28050
Homo sapiens	4128	30	947961	7254	82134	29122	31598.7
Mus musculus/domesticus	872	10	85260	2937	22890	6141	8526
Galleria mellonella	242	20	416855	1803	56842	16594.5	20842.8
Drosophila melanogaster	671	10	323584	8698	53710	35110	32358.4
Zostera marina	2933	20	479115	11102	48647	21739	23955.8
Triticum aestivum	548	8	19291	739	5306	1929.5	2411.38
Hydra	199	10	378942	7965	97390	18193.5	37894.2
C. elegans	3041	10	385436	16043	65633	35600.5	38543.6
Aplysina aerophoba	433	9	138882	8923	28250	13032	15431.3
Aurelia aurita	807	18	813311	20255	79019	43283.5	45183.9
Mnemiopsis leidyi	1306	12	586118	21826	69665	51222.5	48843.2
Halichondria panicea	870	10	283278	14473	56874	24001	28327.8
Positive controls	3997	13	312342	8638	46398	20349	24026.3
Negative/Prep controls	247	5	18869	578	9541	2298	3773.8
	Before cutoff 500 reads			After cutoff 500 reads
Percent remained after QF	#ASVs	#samples	Total reads	#ASVs	#samples	Total reads
	96.2959	96.0396	85.8646	96.1319	91.5842	85.8417
Homo sapiens	53.7619	70	73.632	98.2857	100	97.7269
Mus musculus/domesticus	90.0826	100	81.386	90.0826	100	81.386
Galleria mellonella	79.4702	100	71.7625	80.1325	100	71.773
Drosophila melanogaster	87.0588	100	53.3488	87.7124	100	78.6733
Zostera marina	96.0682	100	67.4681	96.1009	100	67.473
Triticum aestivum	73.2262	42.1053	9.58915	73.3601	42.1053	9.60808
Hydra	83.8298	100	77.4726	84.6809	100	88.4655
C. elegans	97.371	100	95.6753	97.4992	100	96.4798
Aplysina aerophoba	98.6301	100	99.9698	98.8584	100	99.9719
Aurelia aurita	94.4836	100	99.3969	94.7183	100	99.3987
Mnemiopsis leidyi	95.0329	100	94.5149	95.3981	100	97.7259
Halichondria panicea	95.1807	100	98.3068	95.2903	100	98.3078
Positive controls	98.1582	100	93.3136	98.1582	100	93.3136
Negative/Prep controls	45.3008	45.4545	30.0412	46.4286	45.4545	31.5704
