# Supplementary material for: The archaeome in metaorganism research, with a focus on marine models and their bacteria–archaea interactions
Source: Front Microbiol. 2024 Feb 27;15:1347422. doi: 10.3389/fmicb.2024.1347422 (PMC10927989; doi:10.3389/fmicb.2024.1347422)
Supplement: SUPPLEMENTARY TABLE S2 — Results of the pairwise PERMANOVA analysis on Bray-Curtis distances between hosts. [file Table_2.xlsx]

## Sheet: TableS2 Inter-host permanova 
Pairwise Permanova on Bray-Curtis Distance vs host					Archaea: Pairwise Permanova on Bray-Curtis Distance vs. host
Permutations: 999	SumofSq	R2	F	p	SumofSq	R2	F	p
aquatic vs terrestrial	3546	0.05049	77111	0.001	24922	0.0878	57751	0.001
Homo sapiens vs Galleria mellonella	0.009065025	0.5242928	5290241	0.001
Homo sapiens vs Drosophila melanogaster	0.005304885	0.4879263	3620806	0.001
Homo sapiens vs Aplysina aerophoba	0.005444788	0.530532	4181262	0.001	0.014937785	0.7632202	48.35	0.001
Homo sapiens vs Halichondria panicea	0.00625297	0.5540516	4721165	0.001	0.007591114	0.5846952	2252592	0.001
Homo sapiens vs Mnemiopsis leidyi	0.007822274	0.5808794	5543792	0.001	0.0008623764	0.1990115	3229945	0.011
Homo sapiens vs Triticum aestivum	0.0006539764	0.1122466	4551804	0.003	0.01457582	0.5937927	2631235	0.001
Homo sapiens vs Hydra	0.004385098	0.4473627	307612	0.001
Homo sapiens vs Mus musculus	0.0008027412	0.134455	5902975	0.001
Homo sapiens vs Aurelia aurita	0.00760731	0.3798038	2817007	0.001	0.005799068	0.3377618	816049	0.012
Homo sapiens vs Caenorhabditis elegans	0.0007331242	0.1257283	5464747	0.001	0.0002114611	0.0831671	0.9978242	0.393
Galleria mellonella vs Drosophila melanogaster	0.010644895	0.7093383	6833191	0.001
Galleria mellonella vs Aplysina aerophoba	0.010212557	0.7386952	7632762	0.001
Galleria mellonella vs Halichondria panicea	0.011464154	0.7497047	8386786	0.001
Galleria mellonella vs Mnemiopsis leidyi	0.013770408	0.7562471	9307545	0.001
Galleria mellonella vs Triticum aestivum	0.003676142	0.4809886	2409524	0.001
Galleria mellonella vs Hydra	0.009216807	0.6863721	6127778	0.001
Galleria mellonella vs Mus musculus	0.004287368	0.5197164	3029889	0.001
Galleria mellonella vs Aurelia aurita	0.01562374	0.5820961	501442	0.001
Galleria mellonella vs Caenorhabditis elegans	0.003850792	0.4973149	2770087	0.001
Drosophila melanogaster vs Aplysina aerophoba	0.007604494	0.8884262	1353655	0.001
Drosophila melanogaster vs Halichondria panicea	0.008363921	0.8772941	1286922	0.001
Drosophila melanogaster vs Mnemiopsis leidyi	0.009695805	0.844824	1088859	0.001
Drosophila melanogaster vs Triticum aestivum	0.002868469	0.6866211	350564	0.001
Drosophila melanogaster vs Hydra	0.006722085	0.8122367	7786537	0.001
Drosophila melanogaster vs Mus musculus	0.003229537	0.7122851	4456193	0.001
Drosophila melanogaster vs Aurelia aurita	0.010203313	0.543814	309943	0.001
Drosophila melanogaster vs Caenorhabditis elegans	0.003063389	0.7127131	4465513	0.001
Aplysina aerophoba vs Halichondria panicea	0.0080894793	0.95058503	3270253	0.001	0.037895017	0.8378666	878519	0.001
Aplysina aerophoba vs Mnemiopsis leidyi	0.009385876	0.90097567	172872	0.001	0.017190011	0.760553	4446806	0.001
Aplysina aerophoba vs Triticum aestivum	0.0028912019	0.8377714	774621	0.001	0.05860609	0.8310763	934768	0.001
Aplysina aerophoba vs Hydra	0.0065686433	0.8908753	1387851	0.001
Aplysina aerophoba vs Mus musculus	0.0032312805	0.8533764	9894315	0.001
Aplysina aerophoba vs Aurelia aurita	0.009768895	0.5557216	3127102	0.001	0.03653451	0.7329535	4665933	0.001
Aplysina aerophoba vs Caenorhabditis elegans	0.003178312	0.8674901	1112923	0.001	0.01216112	0.7400283	3415887	0.001
Halichondria panicea vs Mnemiopsis leidyi	0.010024287	0.889411	1608499	0.001	0.006585783	0.516313	1601179	0.001
Halichondria panicea vs Triticum aestivum	0.0032164569	0.8058969	6643044	0.001	0.04283334	0.7717274	6761453	0.001
Halichondria panicea vs Hydra	0.007256916	0.8768254	128134	0.001
Halichondria panicea vs Mus musculus	0.0036144144	0.8243744	8449076	0.001
Halichondria panicea vs Aurelia aurita	0.010767351	0.5729738	348862	0.001	0.01289933	0.4783185	1650381	0.001
Halichondria panicea vs Caenorhabditis elegans	0.0035250918	0.8342592	9060334	0.001	0.006231116	0.5533378	1610477	0.001
Mnemiopsis leidyi vs Triticum aestivum	0.003815013	0.733548	4955437	0.001	0.01837505	0.6309264	2906127	0.001
Mnemiopsis leidyi vs Hydra	0.008490363	0.8388974	1041445	0.001
Mnemiopsis leidyi vs Mus musculus	0.00433106	0.7582203	6271995	0.001
Mnemiopsis leidyi vs Aurelia aurita	0.012126109	0.5840568	3931689	0.001	0.006509153	0.3488871	803748	0.016
Mnemiopsis leidyi vs Caenorhabditis elegans	0.004185723	0.7614411	6383673	0.001	0.0009197203	0.2282992	295839	0.03
Triticum aestivum vs Hydra	0.002155445	0.6503623	2976165	0.001	0.04116292	0.6882176	4414731	0.001
Triticum aestivum vs Mus musculus	0.0004424097	0.3272822	778412	0.002	0.009929868	0.5082086	1550074	0.007
Triticum aestivum vs Aurelia aurita	0.003001161	0.2687961	8822582	0.002
Triticum aestivum vs Caenorhabditis elegans	0.0004281868	0.3377266	8159208	0.001
Hydra vs Mus musculus	0.002510822	0.6850955	3916019	0.001
Hydra vs Aurelia aurita	0.008682284	0.5080014	2684568	0.001
Hydra vs Caenorhabditis elegans	0.002430598	0.6914923	4034539	0.001
Mus musculus vs Aurelia aurita	0.003470484	0.2984119	1105878	0.001
Mus musculus vs Caenorhabditis elegans	0.0005213837	0.3843961	1123958	0.001
Aurelia aurita vs Caenorhabditis elegans	0.003302114	0.2898682	1061292	0.003	0.004926129	0.3091564	5817574	0.023
