# Supplementary material for: The archaeome in metaorganism research, with a focus on marine models and their bacteria–archaea interactions
Source: Front Microbiol. 2024 Feb 27;15:1347422. doi: 10.3389/fmicb.2024.1347422 (PMC10927989; doi:10.3389/fmicb.2024.1347422)
Supplement: SUPPLEMENTARY TABLE S4 — Network properties from the network of archaeal and bacterial ASVs in NetCoMi, including clusters, hubs, degrees and centrality scores. [file Table_4.xls]

## Sheet: Sheet1
Results from the network analysis in NetCoMi
Eigenvector & degree	Definitions and Host where this is an indicator taxon
Component sizes
```````````````
size: 231
#: 1
______________________________
Global network properties
`````````````````````````
Whole network:
Number of components 1.00000
Clustering coefficient 0.18336
Modularity 0.63119
Positive edge percentage 94.19525
Edge density 0.02853
Natural connectivity 0.00628
Vertex connectivity 1.00000
Edge connectivity 1.00000
Average dissimilarity* 0.99032
Average path length** 2.71518
-----
*: Dissimilarity = 1 - edge weight
**: Path length = Units with average dissimilarity
______________________________
Clusters	Identify functional groups in microbial communities
- In the whole network	A group of nodes that are highly connected to one another and have a small number of connections to outside nodes
- Algorithm: cluster_fast_greedy
````````````````````````````````
name: 1 2 3 4 5 6
#: 11 31 35 48 60 46
______________________________
Hubs	Keystone taxa with a potentially important role
- In alphabetical/numerical order	can be calculated based on degree, betweenness, closeness and eigenvector centrality
- Based on empirical quantiles of centralities
```````````````````````````````````````````````	Bold
	A.aerophoba
	A.aerophoba
BSV1981	A.aerophoba
BSV3264	A.aerophoba
	A.aerophoba
	A.aerophoba
BSV704	A.aerophoba
BSV809	A.aerophoba
	A.aerophoba
	A.aerophoba
	A.aerophoba
	A.aerophoba
______________________________
Centrality measures
- In decreasing order
- Computed for the complete network
````````````````````````````````````
Degree (unnormalized):	Number of adjacent nodes (red circles)
ASV824 12	indicator for H. panicea: Nanoarchaea
BSV809 12	indicator for A. aerophoba:
ASV51 11	indicator for H. panicea: Nanoarchaea
ASV154 11	indicator for H. panicea: Crenarchaeota
BSV591 11	indicator for H. panicea: Crenarchaeota
Betweenness centrality (normalized):	Central nodes that connect subnetworks (blue circles)
	Fraction of times a node lies on the shortest path between other nodes
BSV3264 0.10325	A.aerophoba
ASV6 0.07720	A.aerophoba
ASV1 0.07302	A.aerophoba
BSV1028 0.06827	A.aerophoba
BSV1981 0.06463	A.aerophoba
Closeness centrality (normalized):	The nodes with the minimum shortest path to all other nodes
BSV3264 0.55117	A.aerophoba
ASV9 0.52876	H. panicea
BSV1981 0.51720	A.aerophoba
ASV57 0.51285	A. aurita
BSV3414 0.51175	A. aurita
Eigenvector centrality (normalized):	Connection among central nodes
	A node is central if it is connected to other nodes with a central position
BSV809 1.00000	A.aerophoba
BSV3264 0.89045	A.aerophoba
BSV704 0.85992	A.aerophoba
BSV898 0.77362	A.aerophoba
BSV1540 0.77271	A.aerophoba
